# Supplementary material for: Characteristics of the microstructure and the key components of white kidney bean sourdough bread induced by mixed-strain fermentation and its influence on gut microbiota
Source: Royal Society of Chemistry journal article supplement (doi:10.1039/d3fo01547e), 2023-01-01
Supplement: d3fo01547e1.pdf [file d3fo01547e1.pdf]

SUPPLEMENTARY TABLES

Table S1: Kinetic parameters of growth and acidification of different lactic acid bacteria in white kidney bean sourdough.

| LAB strains | A (Log cfu/g)          | $\lambda$ (h)          | Vmax ( $\Delta$ log cfu/g/h) | $\Delta$ pH            | $\lambda$ (h)          | Vmax ( $\Delta$ pH/h)   |
|-------------|------------------------|------------------------|------------------------------|------------------------|------------------------|-------------------------|
| L1          | 2.53±0.12 <sup>a</sup> | 2.56±0.15 <sup>d</sup> | 0.39±0.13 <sup>a</sup>       | 2.33±0.04 <sup>a</sup> | 0.46±0.07 <sup>b</sup> | 0.48±0.02 <sup>a</sup>  |
| M12         | 2.20±0.20 <sup>b</sup> | 3.45±0.22 <sup>c</sup> | 0.25±0.08 <sup>ab</sup>      | 2.09±0.04 <sup>b</sup> | 0.82±0.20 <sup>a</sup> | 0.31±0.12 <sup>ab</sup> |
| N2-9        | 1.86±0.09 <sup>c</sup> | 4.23±0.17 <sup>a</sup> | 0.16±0.05 <sup>b</sup>       | 1.80±0.03 <sup>c</sup> | 0.58±0.04 <sup>b</sup> | 0.19±0.08 <sup>b</sup>  |
| C2-8        | 2.12±0.14 <sup>b</sup> | 3.68±0.10 <sup>b</sup> | 0.28±0.10 <sup>ab</sup>      | 1.84±0.08 <sup>c</sup> | 0.97±0.30 <sup>a</sup> | 0.22±0.03 <sup>b</sup>  |
| J28         | 2.46±0.20 <sup>a</sup> | 2.30±0.14 <sup>c</sup> | 0.41±0.15 <sup>a</sup>       | 2.28±0.06 <sup>a</sup> | 0.40±0.15 <sup>b</sup> | 0.42±0.07 <sup>a</sup>  |

LAB strains, L1: *Lactobacillus plantarum* LPL-1, M12: *Lactobacillus harbinensis* FQ003, N2-9: *Lactobacillus plantarum* SCHI, C2-8: *Lactobacillus fermentum* LG1 and J28: *Pediococcus pentosaceus* SCHI isolated from Qu starters.

Table S2. Formulation and nutrition of the different customized bread diets.

| Ingredient (g)      | Customized bread diets** |             |             |
|---------------------|--------------------------|-------------|-------------|
|                     | WK                       | WKS-JK      | WKS-LK      |
| Bread powder*       | 500                      | 500         | 500         |
| Casein, 30 Mesh     | 100                      | 100         | 100         |
| L-Cystine           | 1.5                      | 1.5         | 1.5         |
| Corn Starch         | 198.5                    | 198.5       | 198.5       |
| Maltodextrin        | 66                       | 66          | 66          |
| Sucrose             | 50                       | 50          | 50          |
| Cellulose           | 25                       | 25          | 25          |
| Soybean Oil         | 35                       | 35          | 35          |
| t-Butylhydroquinone | 0.007                    | 0.007       | 0.007       |
| Mineral Mix S10022G | 17.5                     | 17.5        | 17.5        |
| Vitamin Mix V10037  | 5                        | 5           | 5           |
| Choline Bitartrate  | 1.25                     | 1.25        | 1.25        |
| <b>Total</b>        | <b>1000</b>              | <b>1000</b> | <b>1000</b> |

\*Bread (Table 1) dried (40°C for 8 h) and pulverized into a powder.

\*\*Processed into pellets, purified (irradiated) by Jiangsu synergy pharmaceutical Bioengineering Co., Ltd (Nanjing, China) (Order number: xd202112001640).
